# Supplementary material for: Can water continuously oxidize the PuO molecule? Mechanisms, topological analysis and rate constant calculations
Source: Royal Society of Chemistry journal article supplement (doi:10.1039/c7ra12812f), 2018-01-01
Supplement: c7ra12812f1.pdf [file c7ra12812f1.pdf]

Table of Contents Entry

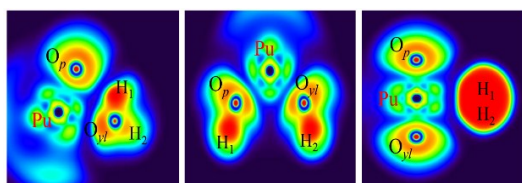

A detailed description of the PuO continuously oxidized by water in the gas-phase.
